# Supplementary material
Source: Springer Nature journal article supplement (https://www.springermedizin.de/resource/supplementary/13045_2010_137_MOESM1_ESM.pdf/9660788)

## Study Centers

Center 1:  
6 NSCLC patients  
randomized 1:1

Center 2:  
6 BC patients  
randomized 1:1

Center 3:  
6 GC patients  
randomized 1:1

Center 4:  
6 RCC patients  
randomized 1:1

## Cohorts

Everolimus 5 mg/day  
12 patients (3 BC, 3 NSCLC,  
3 RCC, 3 GC)

Everolimus 10 mg/day  
12 patients (3 BC, 3 NSCLC,  
3 RCC, 3 GC)

R  
A  
N  
D  
O  
M  
I  
Z  
E

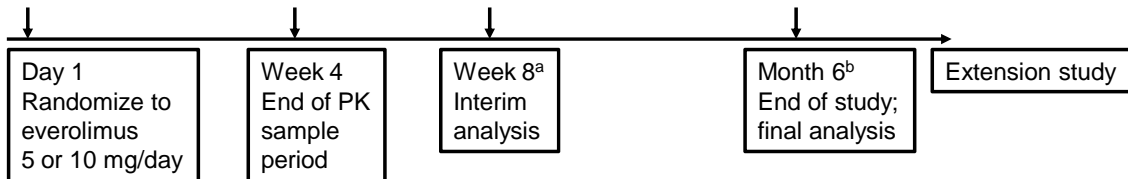

Supplement: MOESM1 [file 9660788]
